# Supplementary material for: Association Between the Use of Psychotropic Medications and the Risk of COVID-19 Infection Among Long-term Inpatients With Serious Mental Illness in a New York State–wide Psychiatric Hospital System
Source: PubMed Central journal article supplement (PMC9077485; doi:10.1001/jamanetworkopen.2022.10743), 2022-05-06
Supplement: jamanetwopen-e2210743-s001.pdf [file jamanetwopen-e2210743-s001.pdf]

## Supplementary Online Content

Nemani K, Williams SZ, Olfson M, et al. Association between the use of psychotropic medications and the risk of COVID-19 infection among long-term inpatients with serious mental illness in a New York State–wide psychiatric hospital system. *JAMA Netw Open*. 2022;5(5):e2210743.

doi:10.1001/jamanetworkopen.2022.10743

**eFigure.** Study Profile

**eTable 1.** Psychotropic Medications Exposure in Full Cohort and by Infection and Death

**eTable 2.** *ICD-9/10* Category Codes Used to Identify Medical Conditions and Psychiatric Diagnoses

**eTable 3.** Incidence and Adjusted Odds Ratios of COVID-19 Infection by Psychotropic Medication Exposure in Patients with PCR Testing

This supplementary material has been provided by the authors to give readers additional information about their work.

**eFigure. Study Profile**

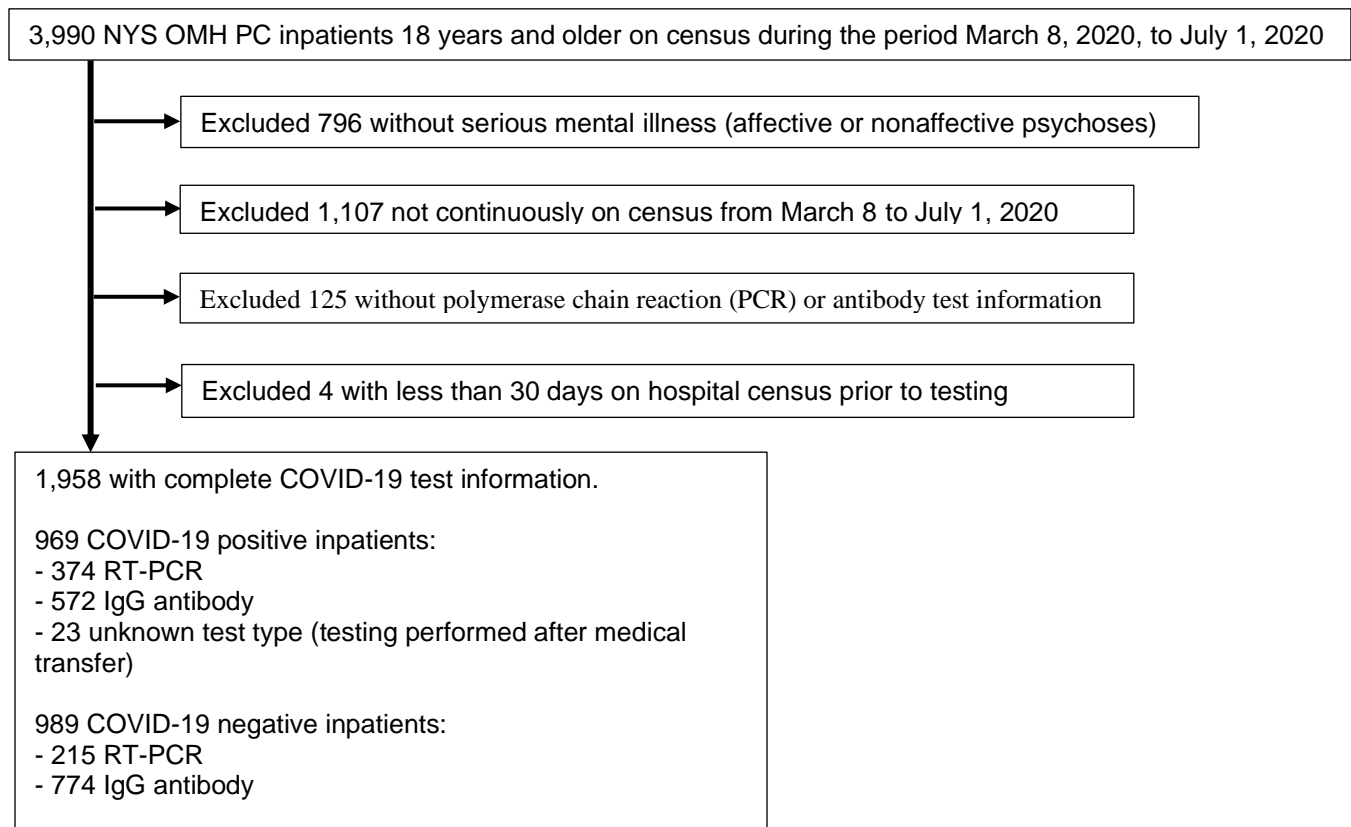

**eTable 1. Psychotropic Medications Exposure in Full Cohort and by Infection and Death<sup>a</sup>**

| Psychotropic medication                 | Total, n (%)  | COVID-19 positive, n (%) | COVID-19 death, n (%) |
|-----------------------------------------|---------------|--------------------------|-----------------------|
| <i>All</i>                              | 1,958 (100.0) | 969 (100.0)              | 38 (100.0)            |
| <b>First-generation antipsychotics</b>  | 1,198 (61.2)  | 611 (63.1)               | 23 (60.5)             |
| Haloperidol                             | 886 (45.2)    | 453 (46.8)               | 19 (50.0)             |
| Fluphenazine                            | 274 (14.0)    | 138 (14.2)               | 3 (7.9)               |
| Chlorpromazine                          | 134 (6.8)     | 47 (4.9)                 | 0 (0.0)               |
| Perphenazine                            | 37 (1.9)      | 20 (2.1)                 | 0 (0.0)               |
| Loxapine                                | 31 (1.6)      | 19 (2.0)                 | 0 (0.0)               |
| Prochlorperazine                        | 10 (0.5)      | 3 (0.3)                  | 0 (0.0)               |
| Thioridazine                            | 5 (0.3)       | 4 (0.4)                  | 0 (0.0)               |
| Pimozide                                | 1 (0.1)       | 1 (0.1)                  | 1 (2.6)               |
| Trifluoperazine                         | 1 (0.1)       | 0 (0.0)                  | 0 (0.0)               |
| <b>Second-generation antipsychotics</b> | 1,794 (91.6)  | 870 (89.8)               | 33 (86.8)             |
| Olanzapine                              | 860 (43.9)    | 398 (41.1)               | 14 (36.8)             |
| Clozapine                               | 712 (36.4)    | 341 (35.2)               | 6 (15.8)              |
| Risperidone                             | 377 (19.2)    | 157 (16.2)               | 3 (7.9)               |
| Aripiprazole                            | 266 (13.6)    | 131 (13.5)               | 3 (7.9)               |
| Quetiapine                              | 262 (13.4)    | 126 (13.0)               | 6 (15.8)              |
| Paliperidone                            | 186 (9.5)     | 67 (6.9)                 | 2 (5.3)               |
| Ziprasidone                             | 56 (2.9)      | 19 (2.0)                 | 0 (0.0)               |
| Lurasidone                              | 11 (0.6)      | 3 (0.3)                  | 0 (0.0)               |
| Cariprazine                             | 5 (0.3)       | 1 (0.1)                  | 0 (0.0)               |
| Pimavanserin                            | 1 (0.1)       | 0 (0.0)                  | 0 (0.0)               |
| <b>Mood stabilizers</b>                 | 1,043 (53.3)  | 541 (55.8)               | 19 (50.0)             |
| Valproic acid                           | 688 (35.1)    | 363 (37.5)               | 16 (42.1)             |
| Lithium                                 | 375 (19.2)    | 190 (19.6)               | 6 (15.8)              |
| Lamotrigine                             | 136 (7.0)     | 74 (7.6)                 | 2 (5.3)               |
| Topiramate                              | 38 (1.9)      | 20 (2.1)                 | 0 (0.0)               |
| <b>Antidepressants</b>                  | 547 (27.9)    | 261 (26.9)               | 6 (15.8)              |
| Sertraline                              | 145 (7.4)     | 62 (6.4)                 | 1 (2.6)               |
| Citalopram                              | 134 (6.8)     | 70 (7.2)                 | 1 (2.6)               |
| Escitalopram                            | 88 (4.5)      | 47 (4.9)                 | 0 (0.0)               |
| Mirtazapine                             | 82 (4.2)      | 35 (3.6)                 | 3 (7.9)               |
| Fluoxetine                              | 66 (3.4)      | 29 (3.0)                 | 0 (0.0)               |
| Venlafaxine                             | 53 (2.7)      | 26 (2.7)                 | 0 (0.0)               |
| Bupropion                               | 43 (2.2)      | 16 (1.7)                 | 0 (0.0)               |
| Paroxetine                              | 29 (1.5)      | 22 (2.3)                 | 1 (2.6)               |
| Fluvoxamine                             | 25 (1.3)      | 16 (1.7)                 | 0 (0.0)               |
| Duloxetine                              | 18 (0.9)      | 5 (0.5)                  | 0 (0.0)               |
| Clomipramine                            | 13 (0.7)      | 6 (0.6)                  | 0 (0.0)               |
| Doxepin                                 | 7 (0.4)       | 0 (0.0)                  | 0 (0.0)               |
| Amitriptyline                           | 3 (0.2)       | 0 (0.0)                  | 0 (0.0)               |
| Imipramine                              | 3 (0.2)       | 2 (0.2)                  | 0 (0.0)               |
| Nortriptyline                           | 2 (0.1)       | 1 (0.1)                  | 0 (0.0)               |
| <b>Benzodiazepines</b>                  | 1,016 (51.9)  | 502 (51.8)               | 16 (42.1)             |
| Lorazepam                               | 810 (41.4)    | 404 (41.7)               | 12 (31.6)             |
| Clonazepam                              | 420 (21.4)    | 198 (20.4)               | 4 (10.5)              |
| Diazepam                                | 19 (1.0)      | 11 (1.1)                 | 0 (0.0)               |
| Alprazolam                              | 1 (0.1)       | 1 (0.1)                  | 0 (0.0)               |
| Temazepam                               | 1 (0.1)       | 1 (0.1)                  | 0 (0.0)               |

<sup>a</sup>Patients can be prescribed multiple medications both within and across psychopharmacologic classes.

**eTable 2.** ICD-9/10 Category Codes Used to Identify Medical Conditions and Psychiatric Diagnoses

| <b>Condition</b>                                  | <b>ICD-9/10 category code</b> |
|---------------------------------------------------|-------------------------------|
| Bipolar disorder                                  | F30* or F31*                  |
| Chronic respiratory disease                       | J43-J45                       |
| Delusional disorder                               | F22                           |
| Diabetes                                          | E08-11, E13                   |
| Heart disease                                     | I21-I25, I30-I52              |
| Hypertension                                      | I10, I11, I15, I16            |
| Major depressive disorder with psychotic features | F2.3 or F33.3                 |
| Schizoaffective disorder                          | F25*                          |
| Schizophrenia                                     | F20*                          |

**eTable 3.** Incidence and Adjusted Odds Ratios of COVID-19 Infection by Psychotropic Medication Exposure in Patients with PCR Testing

| Psychotropic medication         | COVID-19 positive n (%) | Medications only  | Age-Sex Adjusted  | Fully Adjusted <sup>a</sup> |
|---------------------------------|-------------------------|-------------------|-------------------|-----------------------------|
|                                 |                         | OR (95% CI)       | OR (95% CI)       | OR (95% CI)                 |
| All (n=1,363)                   | 374 (27.4)              | --                | --                | --                          |
| First generation antipsychotic  |                         |                   |                   |                             |
| Haloperidol (n=610)             | 177 (29.0)              | 1.04 (0.81, 1.35) | 1.24 (0.87, 1.46) | 0.84 (0.62, 1.13)           |
| Fluphenazine (n=187)            | 51 (27.3)               | 0.93 (0.64,1.35)  | 0.96 (0.66,1.39)  | 0.81 (0.53,1.22)            |
| Chlorpromazine (n=101)          | 14 (13.9)               | 0.42 (0.23,0.75)  | 0.45 (0.24,0.82)  | 0.71 (0.37,1.37)            |
| Second generation antipsychotic |                         |                   |                   |                             |
| Olanzapine (n=618)              | 156 (25.2)              | 0.67 (0.52,0.88)  | 0.70 (0.54,0.92)  | 0.85 (0.62,1.16)            |
| Clozapine (n=493)               | 122 (24.8)              | 0.62 (0.47,0.82)  | 0.73 (0.55,0.98)  | 0.99 (0.70,1.39)            |
| Risperidone (n=282)             | 62 (22.0)               | 0.68 (0.48,0.94)  | 0.69 (0.50,0.97)  | 0.78 (0.53,1.13)            |
| Aripiprazole (n=174)            | 39 (22.4)               | 0.68 (0.46,1.01)  | 0.77 (0.52,1.14)  | 0.67 (0.43,1.04)            |
| Quetiapine (n=185)              | 49 (26.5)               | 0.84 (0.58,1.21)  | 0.85 (0.59,1.23)  | 0.75 (0.49,1.15)            |
| Paliperidone (n=144)            | 25 (17.4)               | 0.51 (0.32,0.81)  | 0.54 (0.34,0.87)  | 0.55 (0.33,0.92)            |
| Mood stabilizers                |                         |                   |                   |                             |
| Valproic acid (n=467)           | 142 (30.4)              | 1.40 (1.08,1.82)  | 1.41 (1.09,1.83)  | 1.57 (1.15,2.13)            |
| Lithium (n=261)                 | 76 (29.1)               | 1.22 (0.90,1.67)  | 1.28 (0.93,1.75)  | 1.10 (0.77,1.58)            |
| Lamotrigine (n=99)              | 37 (37.4)               | 1.88 (1.21,2.92)  | 1.83 (1.17,2.87)  | 2.05 (1.20,3.49)            |

<sup>a</sup>The fully adjusted odds ratios control for age, sex, race/ethnicity, facility size, hospital region, BMI, chronic respiratory disease, diabetes, hypertension, heart disease, and exposure to medications in the model.
